# Supplementary material for: National Early Warning Scores (NEWS2) and component physiology in COVID-19 positive hospitalised patients in the West of England
Source: Research Square preprint supplement (doi:10.21203/rs.3.rs-111849/v1), 2020-11-20

**Appendix 1 NEWS2 Score card**


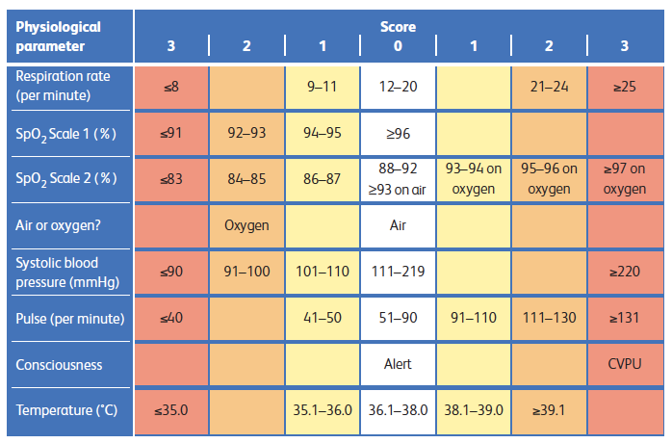


**Appendix 2 Mortality status by change in NEWS2 from first to maximum**


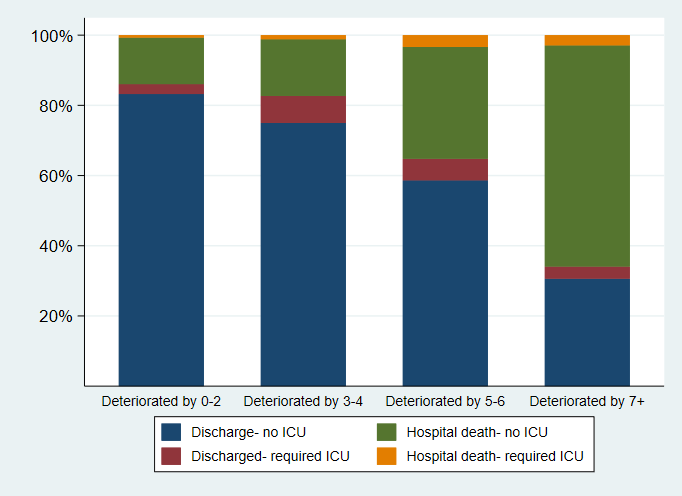


**Appendix 3 Length of stay for survivors by first and maximum NEWS2**


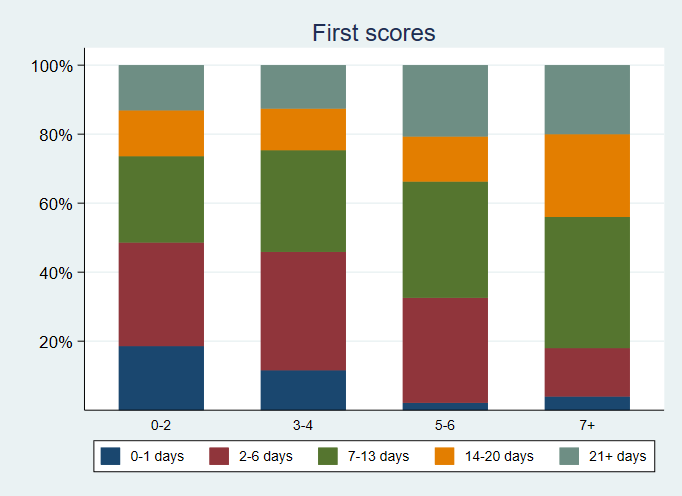


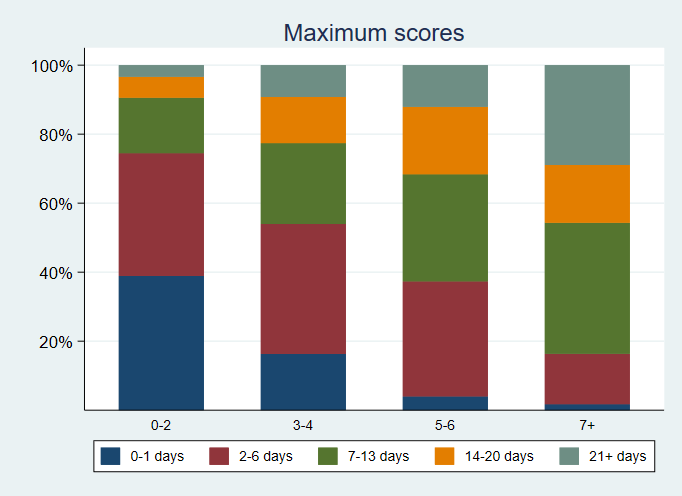

Supplement: Supplementary file 1 [file 0ec78753844d8d1b84697fd3.docx]
